Sacubitril/valsartan in real-life European patients with heart failure with reduced ejection fraction: a systematic review and meta-analysis

S. Giovino<sup>1</sup>, L. Carmisciano<sup>2</sup>, M. Toma<sup>3</sup>, M.P. Sormani<sup>2</sup>, M. Canepa<sup>3</sup>, M. Senni<sup>4</sup>, I. Porto<sup>3</sup>, P. Ameri<sup>3</sup>

<sup>1</sup>IRCCS Policlinic Hospital San Martino, Genova, Italy; <sup>2</sup>University of Genova, Department of Health Sciences, Genova, Italy; <sup>3</sup>Department of Internal Medicine, University of Genova & IRCCS Policlinic Hospital San Martino, Genova, Italy; <sup>4</sup>Ospedale Papa Giovanni XXIII, Bergamo, Italy

Funding Acknowledgement: Type of funding source: None

**Background:** Real-world data are needed to gauge how a therapy is implemented in clinical practice.  
**Methods:** We systematically reviewed the abstracts presented at international congresses and the peer-reviewed original research articles, which described the use of sacubitril/valsartan in European patients with HFrEF from Sep 2014 until Nov 30, 2019. Meta-analysis estimates were combined using a random effects model with inverse variance weights.  
**Results:** 15 abstracts and 11 articles, including 14,179 patients, were selected. Except for a study that evaluated 12,082 (85,2%) subjects, the sample size was 28 (0.2%) to 1,120 (7.9%) patients. Taking as reference PARADIGM-HF, few baseline characteristic were reported for >80% of the pooled population (Table), while all other ones were available for 12% of subjects or less (Figure). Underreporting was less common for articles than for abstracts (OR 0.42, 95% CI: 0.20–0.91). Compared with the patients enrolled in PARADIGM-HF, those in real-life were older and more likely to being previously treated with ARB, MRA and

diuretics (Table). NYHA class III-IV (OR 2.39, 95% CI: 1.58–3.59; I<sup>2</sup>=92%), ICD (OR 4.21, 95% CI: 2.31–7.69; I<sup>2</sup>=93%) and CRT (OR 4.53, 95% CI: 3.89–5.27; I<sup>2</sup>=0%) were also more likely, while a history of hypertension was less frequent (OR 0.61, 95% CI: 0.42–0.87; I<sup>2</sup>=82%).  
The monthly achievement rate of the full dose of sacubitril/valsartan was 6%. When follow-up was ≥6 months, the percentage of subjects reaching the full dose was about 40% and very homogenous. Age and full dose attainment were inversely related ( $\beta$  -2.71, 95% CI: -5.3 to -0.1).  
All cause-mortality and hospitalization rates were 6/100 person-year (9 studies, 1046 patients) and 25/100 person-year (5 studies, 775 patients), respectively.  
**Conclusions:** With the limitation of being heterogeneous and of overall low quality, the literature suggests that, in Europe, sacubitril/valsartan is prescribed to patients with somehow more severe HFrEF than in the pivotal trial, who most often do not reach the full dose.

| Variables reported for >80% of patients |                                    |                                  |                           |                                                                        |
|-----------------------------------------|------------------------------------|----------------------------------|---------------------------|------------------------------------------------------------------------|
| Baseline characteristic                 | Reporting studies<br>N (% of tot.) | Pooled patients<br>N (% of tot.) | Pooled mean (SD) or N (%) | vs. PARADIGM-HF                                                        |
| Age, years                              | 23 (88)                            | 13886 (98)                       | 70.5 (12.2)               | MD +3.07 (95% CI 0.81–5.33), P=0.008<br>I <sup>2</sup> = 97%, P<0.0001 |
| Female sex                              | 23 (88)                            | 13843 (98)                       | 5969 (43.1)               | OR 1.10 (95% CI 0.88–1.39), P=0.40<br>I <sup>2</sup> = 81%, P<0.0001   |
| Diabetes                                | 14 (54)                            | 13191 (93)                       | 4625 (35.1)               | OR 1.07 (95% CI 0.84–1.37), P=0.58<br>I <sup>2</sup> = 81%, P<0.0001   |
| Prior ACEi                              | 8 (31)                             | 12831 (90)                       | 7295 (56.9)               | OR 0.59 (95% CI 0.43–0.81), P=0.013<br>I <sup>2</sup> = 79%, P<0.0001  |
| Beta-blocker                            | 14 (54)                            | 13288 (94)                       | 12011 (90)                | OR 1.14 (95% CI 0.80–1.63), P=0.46<br>I <sup>2</sup> = 57%, P=0.017    |
| MRA                                     | 14 (54)                            | 13288 (94)                       | 8648 (65)                 | OR 3.56 (95% CI 2.24–5.65), P<0.0001<br>I <sup>2</sup> = 94%, P<0.0001 |
| Diuretic                                | 7 (27)                             | 12489 (88)                       | 10790 (86)                | OR 1.50 (95% CI 1.23–1.82), P<0.0001<br>I <sup>2</sup> = 17%, P=0.16   |

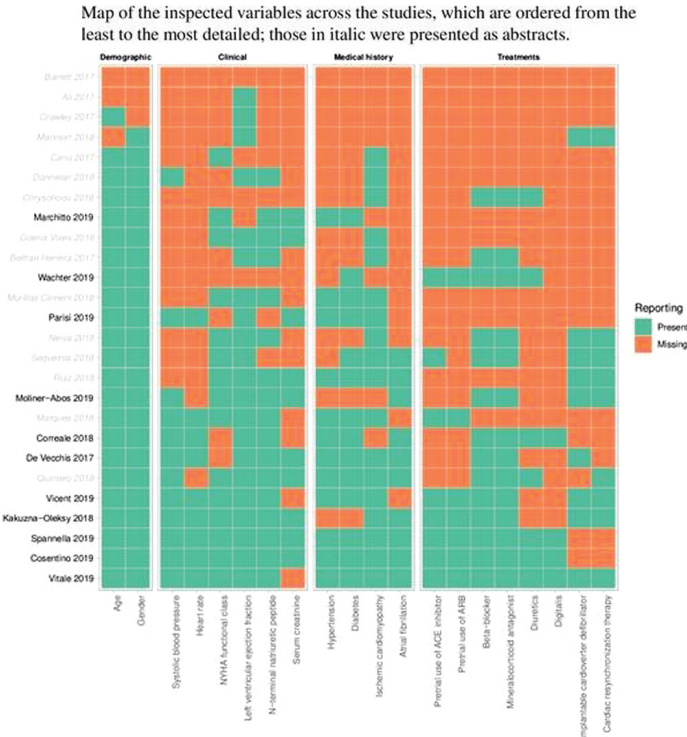

Source: http://academic.oup.com/eurheartj/article-pdf/41/Supplement_2/ehaa946.1028/34519442/ehaa946.1028.pdf
